# Supplementary material for: Functional Characterization of a Flavone Synthase That Participates in a Kumquat Flavone Metabolon
Source: Front Plant Sci. 2022 Mar 2;13:826780. doi: 10.3389/fpls.2022.826780 (PMC8924551; doi:10.3389/fpls.2022.826780)
Supplement: Supplementary file 7 [file Table_1.DOCX]

**Table S1. List of primer sequences used in this article**

| **Primer names** | **Purpose** | **Primer sequences (5’-3’)** | |
| --- | --- | --- | --- |
| **Forward primer** | **Reverse primer** |
| *PFcFNSII-1-ORF* | ORF amplication | ATGGTTGATTTCAGAGGCTAC | TCAGGATAATGGAAACGGATTAATC |
| *P FcFNSII-2-ORF* | ATGGCTGGCATGCAAGATGC | TCAGATTGATGGGAATGGAC |
| *P FcCHS1-ORF* | ATGGTGACCGTCGATGAAG | TTAAGCAGCGGCAACACTGTG |
| *P FcCHS2-ORF* | ATGGCAACCGTTCAAGAGATC | TCAAGCTTTGATGGGGACAC |
| *P FcCHI-ORF* | ATGAATCCCTCACCGTCCGTC | TCATTTCATCTTATCACTAG |
| *P FcCHIL-ORF* | ATGGCCACTGAAGTTGTAATG | TCATTTTGATAACTCAGCTGAG |
| *P FcFNSII-1-qPCR* | qRT-PCR analysis | GCAAGATTATATTTGGTTCTG | CTCTGGTCAACTTGATTTCTG |
| *P FcFNSII-2-qPCR* | GGAGGGGAGCTTATGAGGTTGAC | CTGTCGCGAGCATCCTTAAGCTG |
| *PActin-qPCR* | CCGACCGTATGAGCAAGGAAA | TTCCTGTGGACAATGGATGGA |
| *PFcFNSII-1-YE* | Yeast protein expression | AGGGCGGCCGCACTAGTATCGATGGTTGATTTCAGAGGCTAC | TTAATTAAGAGCTCAGGATAATGGAAACGGATTAATC |
| *PFcFNSII-2-YE* | ATGGCTGGCATGCAAGATGCAGGGCGGCCGCACTAGTATCG | TTAATTAAGAGCTCATCAGATTGATGGGAATGGAC |
| *PFcFNSII-1-OV* | Transient overexpression | CCGGGTGGTCAGTCCCTTATGGTTGATTTCAGAGGCTAC | AGGAGAGTTGTTGATTCAGGATAATGGAAACGGATTAATC |
| *PFcFNSII-2-OV* | CCGGGTGGTCAGTCCCTTATGGCTGGCATGCAAGATGC | AGGAGAGTTGTTGATTCATCAGATTGATGGGAATGGAC |
| *PFcFNSII-1-gfp* | Subcellular localization | CACGGGGGACTTTGCAACATGGTTGATTTCAGAGGC | TGAAGCGGCCGCTGTACAGGATAATGGAAACGGATTAATC |
| *PnFcFNSII-1-gfp* | CACGGGGGACTTTGCAACATGGTTGATTTCAGAGGC | TGAAGCGGCCGCTGTACATCTCCGGAAGATTGATCGG |
| *PdelFcFNSII-1-gfp* | CACGGGGGACTTTGCAACATGAGTAAGACCACATCTAGTC | TGAAGCGGCCGCTGTACAGGATAATGGAAACGGATTAATC |
| *PFcFNSII-2-gfp* | CACGGGGGACTTTGCAACATGGCTGGCATGCAAGATGC | TGAAGCGGCCGCTGTACAGATTGATGGGAATGGAC |
| *PnFcFNSII-2-gfp* | CACGGGGGACTTTGCAACATGGCTGGCATGCAAGATGC | TGAAGCGGCCGCTGTACAAGTTTTGGCTAAGATGGCTCG |
| *PdelFcFNSII-2-gfp* | CACGGGGGACTTTGCAACATGCAAACCAGGGCTCGCCTCCCG | TGAAGCGGCCGCTGTACAGATTGATGGGAATGGAC |
| *PFcFNSII-1-SU* | SU-YTH | ATGGCCATTACGGCCATGGTTGATTTCAGAGGCTAC | GGCCGAGGCGGCCTTGGATAATGGAAACGGATTAATC |
| *PFcFNSII-2-SU* | ATGGCCATTACGGCCATGGCTGGCATGCAAGATGC | GGCCGAGGCGGCCTTGATTGATGGGAATGGAC |
| *PFcCHS1-SU* | GTGGCCATTACGGCCATGGTGACCGTCGATGAAG | AGGCCGAGGCGGCGGCCGTTAAGCAGCGGCAACACTGTG |
| *PFcCHS2-SU* | GTGGCCATTACGGCCATGGCAACCGTTCAAGAGATC | AGGCCGAGGCGGCGGCCGTCAAGCTTTGATGGGGACAC |
| *PFcCHI-SU* | GTGGCCATTACGGCCATGAATCCCTCACCGTCCGTC | AGGCCGAGGCGGCGGCCGTCATTTCATCTTATCACTAG |
| *PCHIL-SU* | GTGGCCATTACGGCCATGGCCACTGAAGTTGTAATG | AGGCCGAGGCGGCGGCCGTCATTTTGATAACTCAGCTGAG |
| *PFcFNSII-2-BiFC* | BiFC assay | AGTGGATCCATCGATAGTATGGCTGGCATGCAAGATGC | CATCCCGGGAGCGGTACCGATTGATGGGAATGGAC |
| *PFcCHS1-BiFC* | AGTGGATCCATCGATAGTATGGTGACCGTCGATGAAG | CATCCCGGGAGCGGTACCAGCAGCGGCAACACTGTG |
| *PFcCHS2-BiFC* | AGTGGATCCATCGATAGTATGGCAACCGTTCAAGAGATC | CATCCCGGGAGCGGTACCAGCTTTGATGGGGACAC |
| *PFcCHIL-BiFC* | AGTGGATCCATCGATAGTATGGCCACTGAAGTTGTAATG | CATCCCGGGAGCGGTACCTTTTGATAACTCAGCTGAG |
